## 1 Title

2 Molecular mechanism underlying venation patterning in butterflies

## 3 Authors

4 Tirtha Das Banerjee<sup>1,\*</sup> and Antónia Monteiro,<sup>1,2,\*</sup>

## 5 Affiliations

6 1 Department of Biological Sciences, National University of Singapore, Singapore.

7 2 Yale-NUS College, Singapore.

8 \* Authors for correspondence

9 Email: [tirtha\\_banerjee@u.nus.edu](mailto:tirtha_banerjee@u.nus.edu), [antonia.monterio@nus.edu.sg](mailto:antonia.monterio@nus.edu.sg)

## 10 Summary statement

11 The paper describes new domains of venation patterning genes in butterflies and proposes how  
12 simplified venation in other insect lineages might have evolved.

## 13 Abstract

14 The mechanism of wing vein differentiation in *Drosophila* is a classic text-book example of  
15 pattern formation using a system of positional-information, yet very little is known about how this  
16 mechanism differs in species with a different number of veins and how insect venation patterns  
17 evolved. Here, we examine the expression patterns of genes previously implicated in vein  
18 differentiation in *Drosophila* in two butterfly species with more complex venation, the African  
19 squinting bush brown *Bicyclus anynana* and the Asian cabbage white, *Pieris canidia*. We also test  
20 the function of one of these genes, *spalt (sal)*, with CRISPR-Cas9 in *B. anynana*. We identify  
21 both conserved as well as new domains of *decapentaplegic (dpp)*, *engrailed (en)*, *invected (inv)*  
22 and *sal* gene expression in *B. anynana*, and propose how the simplified venation in *Drosophila*  
23 might have evolved via loss of *dpp* and *sal* gene expression domains, silencing of vein inducing  
24 programs at Sal-expression boundaries, and changes in gene expression of vein maintenance  
25 genes.

## 26 MAIN TEXT

### 27 Introduction

28 Current venation patterns in several insect groups appear to be simplified versions of more  
29 complex ancestral patterns. The fossil record indicates that ancestral holometabolous insects, such  
30 as *Westphalomerope maryvonneae*, had highly complex vein arrangements which evolved into  
31 simpler venation with enhanced efficiency to sustain powered flight in modern representatives of  
32 Diptera and Lepidoptera (1). To identify these simplifications, Comstock and Needham in the  
33 1900s developed a system of vein homologies across insects. The system nomenclature  
34 recognizes six veins protruding from the base of the wings called Costa (C), Sub-costa (Sc),  
35 Radius (R), Media (M), Cubitus (Cu) and Anal (A)(2). These veins can later branch into smaller  
36 veins, and cross-veins add additional complexity to venation patterns. Every longitudinal insect  
37 wing vein, however, can be identified using this nomenclature. Vein simplifications over the  
38 course of evolution have happened either via fusion of veins or disappearance of particular veins  
39 (3–6), but the molecular mechanisms behind these simplifications remain unclear.

47 Molecular mechanisms of vein pattern formation have been primarily investigated in the model  
48 vinegar fly *Drosophila melanogaster*, where a classic system of positional information takes  
49 place. Here, the wing is initially sub-divided into two domains of gene expression, and anterior  
50 and posterior compartment, where *engrailed* (*en*) and *invected* (*inv*) expression are restricted to  
51 the posterior compartment (7, 8). A central linear morphogen source of the protein  
52 Decapentaplegic (Dpp) is established at the posterior border of the anterior compartment, and  
53 genes like *spalt* (*sal*) respond to the continuous morphogen gradient in a threshold-like manner,  
54 creating sharp boundaries of gene expression that provide precise positioning for the longitudinal  
55 veins (9, 10). Veins differentiate along these boundaries, along a parallel axis to the Dpp  
56 morphogen source (11, 12). Vein cell identity is later determined by the expression of genes such  
57 as *rhomboid* (*rho*), downstream of *sal* (10, 13). Conversely, intervein cells will later express  
58 *blistered* (*bls*) which suppresses vein development (14, 15). The final vein positions are  
59 determined by the cross-regulatory interaction of *rho* and *bls*.

60  
61 The mechanisms underlying venation patterning in other insect lineages have remained poorly  
62 understood, and so far, gene expression patterns and functions for the few genes examined seem  
63 to be similar to those in *Drosophila* (16–18).

64  
65 Venation patterning in butterflies (order: Lepidoptera) has been examined in a few mutants in  
66 connection with alterations of color pattern development (19, 20) and more directly via the  
67 expression pattern of a few genes during larval development. Two of the species in which a few  
68 of the venation patterning genes have been studied in some detail are the African squinting bush  
69 brown butterfly, *Bicyclus anynana* and common buckeye butterfly, *Junonia coenia*. In both  
70 species, En and/or Inv were localized in the posterior compartment using an antibody that  
71 recognizes the epitope common to both transcription factors (21, 22). The transcript of *Inv* in  
72 *Junonia*, however, appears to be absent from the most posterior part of the wings (23), whereas  
73 the transcript of *hedgehog* (*hh*), a gene is up-regulated by En/Inv (24) has been shown to be  
74 uniformly present in the posterior compartment in both species (21, 25). There is little knowledge  
75 of the expression domains of the other genes, including the main long-range morphogen *dpp* and  
76 its downstream targets (e.g., *sal*). A recent report proposed the presence of a second *dpp*-like  
77 organizer at the far posterior compartment in butterflies (26). This report, however, showed no  
78 direct gene expression or functional evidence and has been debated by other researchers (27).  
79 Currently there is also no functional evidence of altered venation for knock-out phenotypes for  
80 any of these genes in Lepidoptera.

81  
82 Here we explore the expression of an orthologous set of genes to those that are involved in setting  
83 up the veins in *Drosophila* in two butterfly species: *Bicyclus anynana* and *Pieris canidia*. Then  
84 we perform CRISPR-Cas9 to test the function of one of these genes in venation patterning in  
85 *Bicyclus*.

## 86 Results

### 87 Expression of *engrailed* and *invected* transcripts and proteins

88 We first examined the expression pattern of En and Inv at both the transcript and protein levels in  
89 *Bicyclus anynana* and in *Pieris canidia* fifth instar larval wings. We used an antibody that  
90 recognizes the epitope of both proteins and confirmed that En and/or Inv expression is found  
91 throughout the posterior compartment in both forewings and hindwings in *Bicyclus* (21, 28), and  
92 also in *Pieris*, however, a sharp drop in expression levels is observed posterior to the A2 vein in  
93 both species (**Fig. 1, A-D**). We hypothesized that the low En/Inv posterior expression could either  
94 be due to lower levels of transcription or translation of En and/or Inv, or due to the absence of  
95 either of the two transcripts in the area posterior to the A2 vein. To test these hypotheses, we  
96 performed *in-situ* hybridization using probes specific to the transcripts of *en* and *inv* in *Bicyclus*  
97 (see Supp file for sequences). *en* was expressed homogeneously throughout the entire posterior  
98 compartment on both the forewing and the hindwing, but *inv* was restricted to the anterior 70-  
99 75% of the posterior compartment (**Fig. 1, E-H**). Hence, the low levels of En/Inv protein  
100 expression appear to be due to the absence of *inv* transcripts in the most posterior region of the  
101 posterior compartment.  
102

### 103 Expression of *dpp*

104 We explored the presence of transcripts for the BMP signaling ligand Decapentaplegic (Dpp) with  
105 the help of *in-situ* hybridization using a probe specific to its transcript (see Supp file for  
106 sequence). A strong band of *dpp* was observed along the A-P boundary (i.e., along the M1 vein).  
107 However, another strong domain was observed in the lower posterior compartment around the A3  
108 vein (**Fig. 2A; Fig. S3, A-C**).  
109

### 110 Expression and function of *spalt*

111 To localize the transcription factor Sal we performed immunostainings in larval wings of *B.*  
112 *anynana* and *P. canidia* (29). Sal is expressed in four clearly separated domains in both early  
113 (**Fig. 2, B and C**) as well as in mid fifth instar wing discs (**Fig. 2, D and E**). The first domain  
114 appears anterior to the Sc vein. The second domain spans the interval between R2 and M3 veins.  
115 The third domain appears between the Cu2 and A2 veins. No expression is observed in a few cells  
116 posterior to the A2 vein and finally, a fourth domain appears posterior to a boundary between the  
117 A2 and A3 veins (**Fig. 2G**). These expression domains are also observed in *Pieris* (**Fig. 2F**).  
118

119 To test the function of Sal in vein development we targeted this gene using CRISPR-Cas9. The  
120 phenotypes observed support a role for Sal in establishing vein boundaries at three of the four  
121 domains described above (**Fig. 2, B-G**). We observed both ectopic and missing vein phenotypes  
122 in both the forewing and the hindwing at the domains where Sal was present during the larval  
123 stage of wing development (**Fig. 2, H-O**). In the forewing, *sal* crispants generated ectopic and  
124 loss of vein phenotypes in between the R2 and the M3 vein domain (**Fig. 2, J and L; Fig. S2. D**  
125 **and E**) and ectopic veins between the Cu2 and A2 veins (**Fig. 2N**). In the hindwing, we observed  
126 ectopic veins connecting to the existing Sc vein (**Fig. 2M**), missing veins in between the Rs and  
127 M3 vein and ectopic veins connecting to the existing Cu2 vein (**Fig. 2O**).  
128

### 129 Expression of *bls*

130 To localize vein and intervein cells we performed *in-situ* hybridization of the intervein marker  
131 and vein suppressor gene *blistered* (*bls*). In the larval forewing and hindwing of *B. anynana*, *bls* is

expressed in the intervein cells and lacks expression in the vein cells and cells around the wing margin (**Fig. 3, A-C, Fig. S3, D-F**).

## Discussion

A positional-information mechanism like that observed in *Drosophila* appears to be involved in positioning the veins in *Bicyclus* (and *Pieris*) but differences exist between flies and butterflies at multiple stages of the vein patterning mechanism (**Fig. 4**). These differences are highlighted below.

### **The early wings of *Bicyclus* are subdivided into three gene expression domains instead of two as in *Drosophila***

One of the earlier steps in vein patterning in *Drosophila* is the separation of the wing blade into distinct compartments via the expression of *En/Inv* in the posterior compartment (7). *In-situ* hybridizations against the separate transcripts of *en* and *inv* in *Bicyclus*, showed that *en* is expressed across the whole posterior compartment (in the whole region posterior to the M1 vein), as in *Drosophila*, whereas *inv* is expressed only in the most anterior region of the posterior compartment, anterior to the A2 vein. This presumably leads to the higher *En/Inv* protein levels observed anteriorly, and lower protein levels posteriorly. While the *en in-situ* results are new, the *inv* expression is consistent with that observed in a previous study of *J. coenia* (23). The *inv* expression pattern in butterflies is, thus, distinct from that of *Drosophila* where *inv* is expressed homogeneously throughout the posterior compartment (8). These differences in expression of *en* and *inv* between *Drosophila* and *Bicyclus* essentially set up two main domains of gene expression in *Drosophila* wings but three in *Bicyclus* wings: An anterior domain with no *en* or *inv* expression, a middle domain with both *en* and *inv*, and a posterior domain with *en* but no *inv*.

### **Two *dpp* signaling domains are established in *Bicyclus* whereas a single domain is present in the wing pouch of *Drosophila***

The next step in venation patterning in *Drosophila* is the establishment of the main *dpp* organizer along a stripe of cells, in the middle of the wing pouch (30). This group of *dpp*-expressing cells is established just above the *en/inv* expressing cells, at the A-P boundary, where the M1+2 (L4) vein will differentiate (30, 31). In *Bicyclus* we also observe a group of cells expressing *dpp* at the A-P boundary above the M1 vein (**Fig. 4I**). This *dpp* expression in *Bicyclus* is likely driven by Hh diffusing from the posterior compartment to the anterior compartment where *Cubitus interruptus* (*Ci*), the signal transducer of Hh signaling, is present (21, 25). In *Bicyclus*, however, there is a second group of *dpp*-expressing cells around the A3 vein (**Fig. 4I**). This second *dpp* domain in *Bicyclus* is probably activated via a Hh-independent mechanism, since no *Ci* or Patched (the receptor of Hh signaling) expression is observed in the posterior compartment around the A3 vein in butterflies (21, 25). In *Drosophila*, there is also a group of *dpp*-expressing cells outside the wing pouch, which are activated via a Hh independent mechanism (32) (**Fig. 4E**). These two groups of cells could be homologous.

### **Four domains of *Sal* expression are established in *Bicyclus*, whereas a single domain is present in *Drosophila* larval wings**

The expression of *dpp* activates the next step in venation patterning in *Drosophila* which involves the activation of *sal* expression some distance away from the signaling center in a single main central domain (6, 9, 11, 33). Here, the anterior boundary of *Sal* expression is involved in setting up the R2+3 (L2) vein (6, 10, 11, 34). In *Bicyclus*, *Sal* is expressed in four separate domains in the larval wing, only two of which straddle the two *dpp* expression domains (**Fig. 4, I and J**). This suggests that *Dpp* might be activating *sal* in two of the domains where *dpp* and *Sal* are co-expressed and overlap, but a ligand other than *Dpp*, yet to be discovered, might activate *sal* in the

181 first and third domains of Sal expression in *Bicyclus*. It is also interesting to note that in  
182 *Drosophila* only one Sal central domain is present during the larval stage, when vein  
183 differentiation is taking place, but a more anterior and a more posterior Sal expression domain  
184 appear during the pupal stage (10, 35, 36). To our knowledge no study has yet elucidated what  
185 drives the expression of Sal in these additional domains in *Drosophila* pupal wings.

186 **sal crispants show that three Sal boundaries are involved in positioning veins in *Bicyclus*,**  
187 **whereas a single Sal boundary performs this function in *Drosophila***

188 Sal knockout phenotypes in *Bicyclus* led to disruptions of veins in three out of the four Sal  
189 expression domains suggesting that, as in *Drosophila*, Sal is involved in setting up veins. *sal*  
190 crispants displayed: 1) ectopic Sc veins at the posterior boundary of the first Sal expression  
191 domain (Fig. 2M); 2) both ectopic and missing veins in the region of the second Sal domain  
192 straddling the A-P boundary, on both forewings and the hindwings, consistent with previous  
193 results on *Drosophila* (10, 37); and 3) ectopic veins in both the forewing and the hindwing in the  
194 region of the third Sal domain (Fig. 2, J and K; Fig. S2, D and E). The final Sal expression  
195 domain in *Bicyclus* is present posterior to a boundary running in between the A2 and A3 vein  
196 (Fig. 2G), and we obtained no crispant with disruptions in veins in this area. Our data provide  
197 evidence, thus, that Sal boundaries of expression in domains 1, 2, and 3, are involved in  
198 differentiating veins at those boundaries in *Bicyclus*, whereas the boundary of the last Sal domain  
199 most likely are not used to position veins in the most posterior wing region.

200 The presence of both ectopic veins as well as disrupted veins in the domains of Sal expression in  
201 *Bicyclus* might be due to the disruption of the vein-intervein network in those regions. In  
202 *Drosophila*, ectopic and disrupted veins in *sal* knockout mutants are produced due to ectopic and  
203 missing *rho* expression (10). A proposed mechanism for how these genes interact involves Sal  
204 activating a hypothetical short-range diffusible protein (X) in the intervein cells and at the same  
205 time inhibiting the intervein cells from responding to the signal (6, 10). A small amount of this  
206 diffusible protein moves towards the *sal*-negative cells activating vein inducing signals which  
207 includes genes such as *rho* (10) (Fig. 4K). Knockout of *sal* in clones of cells within a *sal*-  
208 expressing domain will create novel or missing boundaries of Sal+ against Sal- cells and will  
209 result in ectopic or missing expression of *rho*, activating or inhibiting vein development. In  
210 *Bicyclus*, we do not have direct evidence of *rho* expression, however, *bls* which has a  
211 complementary expression pattern to *rho* in *Drosophila* (14, 15) is expressed throughout the  
212 *Bicyclus* larval wing with the exception of vein cells and the wing margin (Fig. 3, A-C), similarly  
213 to its expression pattern in *Drosophila*. This indicates that *rho* is likely expressed in the vein cells  
214 and that knocking out *sal* might result in ectopic or loss of *rho* in *Bicyclus* wing, resulting in  
215 ectopic and disrupted vein phenotypes (Fig. 2, J and K).

216 **Loss of *sal* expression domains and of the second *dpp* organizer likely led to venation**  
217 **simplification in *Drosophila***

218 Insect wing venation has simplified over the course of evolution, but it is unclear how exactly this  
219 simplification took place. Insect fossils from the Carboniferous period display many longitudinal  
220 veins in their wings compared to modern insects such as *Drosophila* or even *Bicyclus* (1, 38, 39).  
221 Many of the differences in venation remaining between *Bicyclus* and *Drosophila* are due to the  
222 additional loss of veins in the posterior compartment in *Drosophila* (Fig. 4, B and C). Sal  
223 expression domains and crispant phenotypes in *Bicyclus* indicate that the third Sal expression  
224 domain, present in *Bicyclus* but absent in *Drosophila* is involved in the formation and  
225 arrangement of posterior veins Cu2 and A2. In *Drosophila*, there is partial development of the  
226 Cu2+A1 (L6) vein and there are no A2 and A3 veins (Fig. 4B). The partial and missing veins in

227 the posterior compartment of *Drosophila* are likely due to the reduction of the third and loss of  
228 the fourth Sal expression domains. The loss of the fourth Sal domain was perhaps a consequence  
229 of the partial loss of the second *dpp* organizer, and the reduction of the third domain mediated by  
230 the delayed expression of a yet undiscovered organizer in this region, that becomes activated only  
231 during the pupal stages in *Drosophila*.

### 232 **Simplification of venation is also achieved via silencing of vein inducing or vein maintenance** 233 **mechanisms**

234 Vein number reduction via loss of *sal/dpp* expression domains is one mechanism of vein  
235 reduction across evolution, but a different mechanism of vein reduction appears to take place  
236 downstream of the stable expression of these two genes. For instance, in *Bicyclus*, we observe the  
237 development of veins at both the boundaries of the second Sal domain (i.e., veins R2 and M3)  
238 (**Fig. 4J**), whereas in *Drosophila*, only cells abutting the anterior boundary of the homologous Sal  
239 expression domain activate the R2+3 (L2) vein (10) (**Fig. 4F**). Vein activation proceeds via the  
240 activation of vein-inducing genes such as *rho*, which does not take place at the posterior boundary  
241 of Sal expression in *Drosophila* (**Fig. 4, F and G**) (10). In *Bicyclus*, veins are also not being  
242 activated at the anterior boundary of the fourth Sal expression domain (just anterior to the A3  
243 vein) (**Fig. 4J**). It is still unclear why veins don't form at some boundaries of *sal* expression, but  
244 the paravein hypothesis proposes that loss of a vein inducing program at these boundaries,  
245 resulted in venation simplification in modern insects such as *Drosophila* (6).

246 Further venation simplification might be happening via disruptions of vein maintenance  
247 mechanisms, where vein induction is later followed by vein loss. In *Drosophila*, the maintenance  
248 of vein identity involves the stable expression of *rho* and the exclusion of *bls* from vein cells  
249 throughout wing development (11, 14). Disruptions to this mechanism, however, appear to be  
250 taking place at the A1 vein during *Bicyclus* wing development (**Fig. 3, D-G**). The A1 vein is  
251 present during larval and early pupal wing development (**Fig. 3, D and E**) but is absent in adults  
252 (**Fig. 3, F and G**). In *Bicyclus*, *bls* is absent from the A1 vein in young larval wing discs (**Fig. 3B,**  
253 **Fig. S3D**). However, as the wing grows the expression of *bls* becomes stronger at the A1 vein  
254 (**Fig. 3C; Fig. S3, E and F**). It is possible that during late larval and pupal wing development *bls*  
255 becomes stably expressed at the A1 vein and the vein disappears as a result. It is unclear how the  
256 balance between *bls* and presumably *rho* expression is altered during development in the A1 veins  
257 of *Bicyclus*, but such a mechanism is contributing to the loss of that vein in adults and could be  
258 contributing to vein loss, in general, across insects.

259  
260 In conclusion, we have provided evidence for the presence of three main domains of gene  
261 expression in the early wings of *Bicyclus*, an anterior, middle, and posterior domain instead of  
262 two (anterior and posterior) domains, as observed in *Drosophila*. We have discovered a second  
263 *dpp* expression domain in *B. anynana* present in the posterior of the wing disc, which is absent in  
264 *Drosophila* wing pouch where the vein patterning happens. Furthermore, we have described and  
265 functionally characterized four domains of Sal expression in *Bicyclus*, whose boundaries map to  
266 the development of multiple longitudinal veins in this species. Two of the Sal domains straddle  
267 the two *dpp* expression domains, and may be activated by a *dpp* gradient, but a different and yet  
268 undiscovered ligand (or ligands) is activating the two other Sal domains. The data presented in  
269 this study supports a Positional-Information mechanism involved in venation patterning in  
270 Lepidoptera as that observed in *Drosophila*. Moreover, the data provide support to the hypothesis  
271 of venation simplification in insects via loss of gene expression domains, silencing of vein  
272 inducing boundaries (6, 35), and disruptions to vein maintenance programs (11). However, the  
273 mechanisms proposed in this paper cannot explain every feature of insect venation. Insects with

left-right wing differences in their longitudinal vein branching patterns, such and in *Orosanga japaonicus* (40), and cross-vein patterns, such as in *Athalia rosae* (41, 42) and *Erythremis simplicicolis* (43), most likely pattern their wings using both Positional-Information as well as Reaction-Diffusion mechanisms. Future comparative gene expression studies along with venation patterning modeling should continue to illuminate the evolution and diversity of venation patterning mechanisms in insects.

## Materials and Methods

### Animal husbandry

*Bicyclus anynana* butterflies were reared at 27°C in 12:12 day: night cycle. The larvae were fed young corn leaves and the adults mashed bananas.

### In-situ hybridization

Fifth instar larval wings were dissected in cold PBS and transferred into 1X PBST supplemented with 4% formaldehyde for 30 mins. After fixation, the wings were treated with 1.25 µl (20 mg/ml) proteinase-K (NEB, P8107S) in 1 ml 1X PBST and then with 2 mg/ml glycine in 1X PBST. Afterward, the wings were washed three times with 1X PBST, and the peripodial membrane was removed using fine forceps (Dumont, 11254-20) (in preparation for *in situ* hybridization). The wings were then gradually transferred into a pre-hybridization buffer (see **Table S3** for composition) by increasing the concentration in 1X PBST and incubated in the pre-hybridization buffer for one hour at 60°C. The wings were then incubated in hybridization buffer (see **Table S3** for composition) supplemented with 100ng/µl of probe at 60°C for 16-24 hrs. Subsequently, wings were washed five times with preheated pre-hybridization buffer at 60°C. The wings were then brought back to room temperature and transferred to 1X PBST by gradually increasing the concentration in the pre-hybridization buffer and they were later blocked in 1X PBST supplemented with 1% BSA for 1 hr. After blocking, wings were incubated in 1:3000 anti-digoxygenin labeled probe diluted in block buffer. To localize the regions of gene expression NBT/BCIP (Promega) in alkaline phosphatase buffer (See **Table S3** for composition) was used. The wings were then washed, mounted in 60% glycerol, and imaged under a Leica DMS1000 microscope using LAS v.4.9 software.

### Immunostainings

Fifth instar larval wings were dissected in cold PBS and immediately transferred into a fixation buffer supplemented with 4% formaldehyde (see **Table S4** for composition) for 30 mins. Afterward, the wings were washed with 1X PBS and blocked for one to two days in block buffer (see **Table S4** for composition) at 4°C. Wings were incubated in primary antibodies against En/Inv (1:20, mouse 4F11, a gift from Nipam Patel, (28)), and Sal (1:20000, guinea-pig Sal GP66.1, (29)) at 4°C for one day, washed with wash buffer (see **Table S4** for composition) and stained with secondary antibodies anti-mouse AF488 (Invitrogen, #A28175) and anti-Guinea pig AF555 (Invitrogen, #A-21435) at the concentration 1:500. The wings were then washed in wash buffer, mounted on an in-house mounting media (see **Table S4** for composition), and imaged under an Olympus fv3000 confocal microscope, Zeiss Axio Imager M2.

### CRISPR-Cas9

Knock-out of *sal* was carried out using a protocol described previously(44). Briefly, a guide was designed against a 20 bp region targeting exon 1 of *sal* (see Supp file for sequence). The guide was tested via an *in-vitro* cleavage assay prior to injection. A total of 863 *Bicyclus* embryos were injected with 300 ng/µl of guide and 300 ng/µl of Cas9 protein (NEB; Cat. no.: M0641) mixed

324 together in equal parts (total volume = 10 µl) with an added small amount of food dye (0.5 µl).  
325 The hatchlings were transferred into plastic cups and fed young corn leaves. After pupation, each  
326 individual was assigned a separate emergence compartment (a plastic cup with lid). Once eclosed,  
327 the adults were frozen at -20°C and imaged under a Leica DMS1000 microscope using LAS v4.9  
328 software. Descaling of the adult wings for imaging was done using 100% Clorox solution (45).  
329 Mutant individuals were tested for insertions or deletions via an *in-vitro* endonuclease assay on  
330 the DNA isolated from the wings and then sequenced (Fig. S2).

## 333 References and Notes

- 334 1. A. Nel, P. Roques, P. Nel, J. Prokop, J. S. Steyer, The earliest holometabolous insect from  
335 the Carboniferous: A “crucial” innovation with delayed success (Insecta Protomeropina  
336 Protomeropidae). *Ann. la Soc. Entomol. Fr.* **43**, 349–355 (2007).
- 337 2. J. . H. . Comstock, J. . G. . Needham, The Wings of Insects. *Am. Soc. Nat.* **32**, 43–48 (1898).
- 338 3. J. F. De Celis, F. J. Diaz-Benjumea, Developmental basis for vein pattern variations in insect  
339 wings. *Int. J. Dev. Biol.* **47**, 653–663 (2003).
- 340 4. A. Garcia-bellido, J. F. De Celis, Developmental genetics of the venation pattern: Origin of  
341 Wing Veins. *Annu. Rev. Genet.* **1940**, 28 (1992).
- 342 5. J. Stark, J. Bonacum, J. Remsen, R. DeSalle, THE EVOLUTION AND DEVELOPMENT OF  
343 DIPTERAN WING VEINS: A Systematic Approach. *Annu. Rev. Entomol.* **44**, 97–129 (1999).
- 344 6. E. Bier, Drawing lines in the *Drosophila* wing: Initiation of wing vein development. *Curr.*  
345 *Opin. Genet. Dev.* **10**, 393–398 (2000).
- 346 7. I. Guillén, J. L. Mullor, J. Capdevila, E. Sánchez-Herrero, G. Morata, I. Guerrero, The  
347 function of *engrailed* and the specification of *Drosophila* wing pattern. *Development.* **121**,  
348 3447–3456 (1995).
- 349 8. Y. Cheng, A. L. Brunner, S. Kremer, S. K. DeVido, C. M. Stefaniuk, J. A. Kassis, Co-regulation  
350 of *invected* and *engrailed* by a complex array of regulatory sequences in *Drosophila*. *Dev.*  
351 *Biol.* **395**, 131–143 (2014).
- 352 9. R. Barrio, J. F. De Celis, Regulation of spalt expression in the *Drosophila* wing blade in  
353 response to the Decapentaplegic signaling pathway. *Proc. Natl. Acad. Sci. U. S. A.* **101**,  
354 6021–6026 (2004).
- 355 10. M. a Sturtevant, B. Biehs, E. Marin, E. Bier, The *spalt* gene links the A/P compartment  
356 boundary to a linear adult structure in the *Drosophila* wing. *Development.* **124**, 21–32  
357 (1997).
- 358 11. S. S. Blair, Wing vein patterning in *Drosophila* and the analysis of intercellular signaling.  
359 *Annu. Rev. Cell Dev. Biol.* **23**, 293–319 (2007).
- 360 12. J. F. De Celis, Pattern formation in the *Drosophila* wing: The development of the veins.  
361 *BioEssays.* **25**, 443–451 (2003).
- 362 13. a Guichard, B. Biehs, M. a Sturtevant, L. Wickline, J. Chacko, K. Howard, E. Bier, *rhomboid*  
363 and *Star* interact synergistically to promote EGFR/MAPK signaling during *Drosophila* wing  
364 vein development. *Development.* **126**, 2663–2676 (1999).
- 365 14. D. Fristrom, P. Gotwals, S. Eaton, T. B. Kornberg, M. Sturtevant, J. W. Fristrom, *blistered* : a  
366 gene required for vein / intervein formation in wings of *Drosophila*. **2671**, 2661–2671  
367 (1994).
- 368 15. F. Roch, F. Baonza, E. Martín-Blanco, A. García-Bellido, A. Baonza, E. Martin-Blanco, A.  
369 Garcia-Bellido, Genetic interactions and cell behaviour in *blistered* mutants during  
370 proliferation and differentiation of the *Drosophila* wing. *Development.* **125**, 1823–1832  
371 (1998).



- 372 16. Y. Tomoyasu, S. R. Wheeler, R. E. Denell, Ultrabithorax is required for membranous wing  
373 identity in the beetle *Tribolium castaneum*. *Nature*. **433**, 643–647 (2005).
- 374 17. E. Abouheif, G. A. Wray, Evolution of the gene network underlying wing polymorphism in  
375 ants. *Science (80-. )*. **297**, 249–252 (2002).
- 376 18. D. Wang, J. Li, S. Liu, H. Zhou, L. Zhang, W. Shi, J. Shen, *spalt* is functionally conserved in  
377 *Locusta* and *Drosophila* to promote wing growth. *Nat. Publ. Gr.*, 1–9 (2017).
- 378 19. P. B. Koch, H. F. Nijhout, The role of wing veins in colour pattern development in the  
379 butterfly *Papilio xuthus* (Lepidoptera: Papilionidae). *Eur. J. Entomol.* **99**, 67–72 (2002).
- 380 20. S. R. Schachat, R. L. Brown, Color pattern on the forewing of Micropterix (Lepidoptera:  
381 Micropterigidae): Insights into the evolution of wing pattern and wing venation in moths.  
382 *PLoS One*. **10**, 1–16 (2015).
- 383 21. D. N. Keys, D. L. Lewis, J. E. Selegue, B. J. Pearson, L. V. Goodrich, R. L. Johnson, J. Gates,  
384 M. P. Scott, S. B. Carroll, Recruitment of a *hedgehog* Regulatory Circuit in Butterfly  
385 Eyespot Evolution. *Science (80-. )*. **283**, 532–534 (1999).
- 386 22. A. Monteiro, G. Glaser, S. Stockslager, N. Glansdorp, D. Ramos, Comparative insights into  
387 questions of lepidopteran wing pattern homology. *BMC Dev. Biol.* **6**, 52 (2006).
- 388 23. S. B. Carroll, J. Gates, D. N. Keys, S. W. Paddock, E. F. Grace, J. E. Selegue, J. A. Williams,  
389 Pattern Formation and Eyespot Determination in Butterfly Wings. *Science (80-. )*. **265**,  
390 109–114 (1994).
- 391 24. T. Tabata, S. Eaton, T. B. Kornberg, The *Drosophila hedgehog* gene is expressed specifically  
392 in posterior compartment cells and is a target of *engrailed* regulation. *Genes Dev.* **6**, 2635–  
393 2645 (1992).
- 394 25. S. V. Saenko, M. S. P. P. Marialva, P. Beldade, Involvement of the conserved Hox gene  
395 Antennapedia in the development and evolution of a novel trait. *Evodevo*. **2**, 9 (2011).
- 396 26. R. Abbasi, J. M. Marcus, A new A-P compartment boundary and organizer in  
397 holometabolous insect wings. *Sci. Rep.* **7**, 16337 (2017).
- 398 27. P. A. Lawrence, J. Casal, J. F. de Celis, G. Morata, A refutation to “A new A-P compartment  
399 boundary and organizer in holometabolous insect wings.” *Sci. Rep.* **7**, 16337 (2017).
- 400 28. N. H. Patel, E. Martin-Blanco, K. G. Coleman, S. J. Poole, M. C. Ellis, T. B. Kornberg, C. S.  
401 Goodman, Expression of *engrailed* proteins in arthropods, annelids, and chordates. *Cell*.  
402 **58**, 955–968 (1989).
- 403 29. J. C. Oliver, X. L. Tong, L. F. Gall, W. H. Piel, A. Monteiro, A Single Origin for Nymphalid  
404 Butterfly Eyespots Followed by Widespread Loss of Associated Gene Expression. *PLoS*  
405 *Genet.* **8** (2012), doi:10.1371/journal.pgen.1002893.
- 406 30. H. Tanimoto, S. Itoh, P. Ten Dijke, T. Tabata, Hedgehog creates a gradient of DPP activity  
407 in *Drosophila* wing imaginal discs. *Mol. Cell.* **5**, 59–71 (2000).
- 408 31. P. W. Ingham, M. J. Fietz, Quantitative effects of *hedgehog* and *decapentaplegic* activity  
409 on the patterning of the *Drosophila* wing. *Curr. Biol.* **5**, 432–440 (1995).
- 410 32. D. Foronda, A. Pérez-Garijo, F. A. Martín, Dpp of posterior origin patterns the proximal  
411 region of the wing. *Mech. Dev.* **126**, 99–106 (2009).
- 412 33. M. Strigini, S. M. Cohen, Formation of morphogen gradients in the *Drosophila* wing. *Semin*  
413 *Cell Dev Biol.* **10**, 335–344 (1999).
- 414 34. O. Cook, B. Biehs, E. Bier, *brinker* and *optomotor-blind* act coordinately to initiate  
415 development of the L5 wing vein primordium in *Drosophila*. *Development.* **131**, 2113–24  
416 (2004).
- 417 35. B. Biehs, M. a Sturtevant, E. Bier, Boundaries in the *Drosophila* wing imaginal disc organize  
418 vein-specific genetic programs. *Development.* **125**, 4245–4257 (1998).

- 419 36. N. C. Grieder, G. Morata, M. Affolter, W. J. Gehring, Spalt major controls the development  
420 of the notum and of wing hinge primordia of the *Drosophila melanogaster* wing imaginal  
421 disc. *Dev. Biol.* **329**, 315–326 (2009).
- 422 37. M. F. Organista, J. F. De Celis, The Spalt transcription factors regulate cell proliferation,  
423 survival and epithelial integrity downstream of the Decapentaplegic signalling pathway.  
424 *Biol. Open.* **2**, 37–48 (2013).
- 425 38. J. Prokop, D. Ren, New significant fossil insects from the Upper Carboniferous of Ningxia in  
426 northern China (Palaeodictyoptera, Archaeorthoptera). *Eur. J. Entomol.* **104**, 267–275  
427 (2007).
- 428 39. J. Kukalova-Peck, Origin and evolution of insect wings and their relation to  
429 metamerphosis as documented by fossil record. *J. Morphol.* **156**, 53–125 (1978).
- 430 40. E. Yoshimoto, S. Kondo, Wing vein patterns of the Hemiptera insect *Orosanga japonicus*  
431 differ among individuals. *Interface Focus.* **2**, 451–456 (2012).
- 432 41. S. Matsuda, N. Yoshiyama, J. Künnapuu-Vulli, M. Hatakeyama, O. Shimmi, Dpp/BMP  
433 transport mechanism is required for wing venation in the sawfly *Athalia rosae*. *Insect*  
434 *Biochem. Mol. Biol.* **43**, 466–473 (2013).
- 435 42. Y. Huang, M. Hatakeyama, O. Shimmi, Wing vein development in the sawfly *Athalia rosae*  
436 is regulated by spatial transcription of Dpp/BMP signaling components. *Arthropod Struct.*  
437 *Dev.* **47**, 408–415 (2018).
- 438 43. J. Hoffmann, S. Donoughe, K. Li, M. K. Salcedo, C. H. Rycroft, A simple developmental  
439 model recapitulates complex insect wing venation patterns. *Proc. Natl. Acad. Sci.*,  
440 201721248 (2018).
- 441 44. T. Banerjee, A. Monteiro, CRISPR-Cas9 Mediated Genome Editing in *Bicyclus anynana*  
442 Butterflies. *Methods and Protocols*, **1** (2018).
- 443 45. S. Patil, S. Magdum, Insight into wing venation in butterflies belonging to families  
444 Papilionidae, Nymphalidae and Pieridae from Dang Dist Gujarat, India. *J. Entomol. Zool.*  
445 *Stud.* **5**, 1596–1607 (2017).
- 446  
447

## 448 Acknowledgments

449  
450 This work was supported by a Ministry of Education, Singapore grant MOE2015-T2-2-159 and  
451 the Department of Biological Sciences LHK fund GL 710221. TDB was supported by a Yale-  
452 NUS scholarship. We would like to thank Jocelyn Wee for rearing *Pieris canidia*, Kenneth  
453 McKenna and Fred Nijhout for initial discussions on the paper, Nipam Patel for the anti-  
454 Engrailed/Invected antibody and, Jocelyn Wee, Suriya Narayanan Murugesan and Sofia Sigal-  
455 Passeck for useful comments. The authors declare no conflict of interest.

456  
457

## 458 Figures and Tables

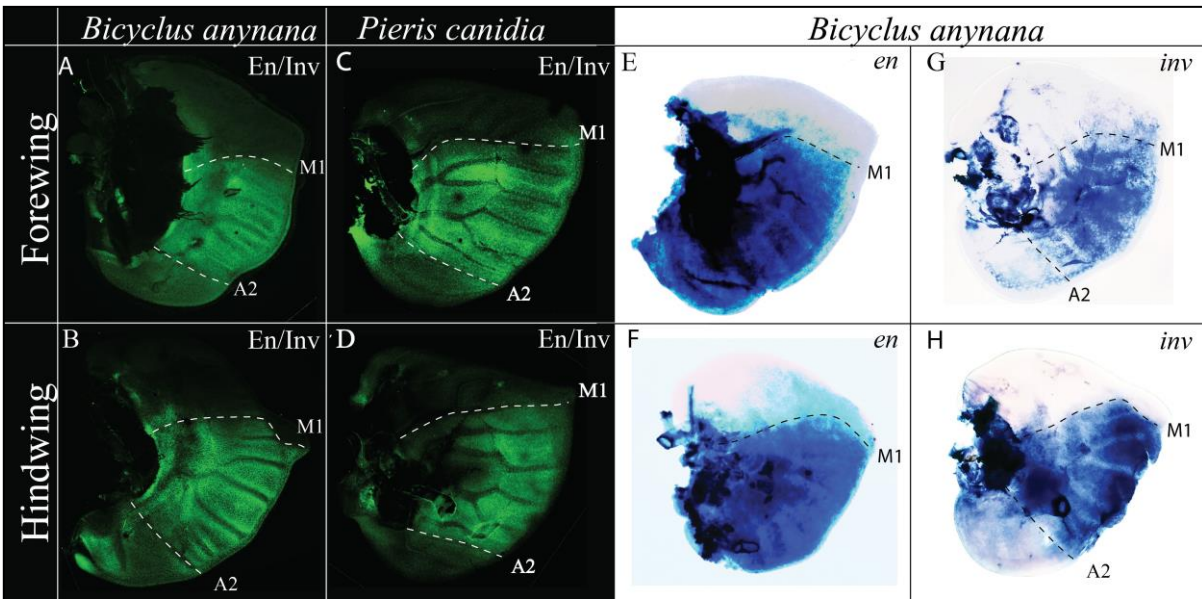

460  
461  
462  
463  
464  
465  
466  
467  
468  
469  
470

**Fig. 1. Expression of Engrailed and Invested proteins in *Bicyclus anynana* and *Pieris canidia* and expression of mRNA transcripts in *Bicyclus anynana*.** (A) Expression of En/Inv proteins in the forewing, and (B) hindwing is strong between the M1 and A2 veins, and weaker posterior to the A2 vein. (C) Expression of En/Inv in the forewing, and (D) hindwing in *Pieris* is strong between the M1 and A2 veins, and weaker posterior to the A2 vein. (E) Expression of *en* mRNA transcripts in the forewing, and (F) hindwing in *Bicyclus* is almost homogeneous across the posterior compartment. (G) Expression of *inv* in the forewing, and (H) hindwing in *Bicyclus* is detected around 70% of the posterior compartment from the M1 vein till the A2 vein.

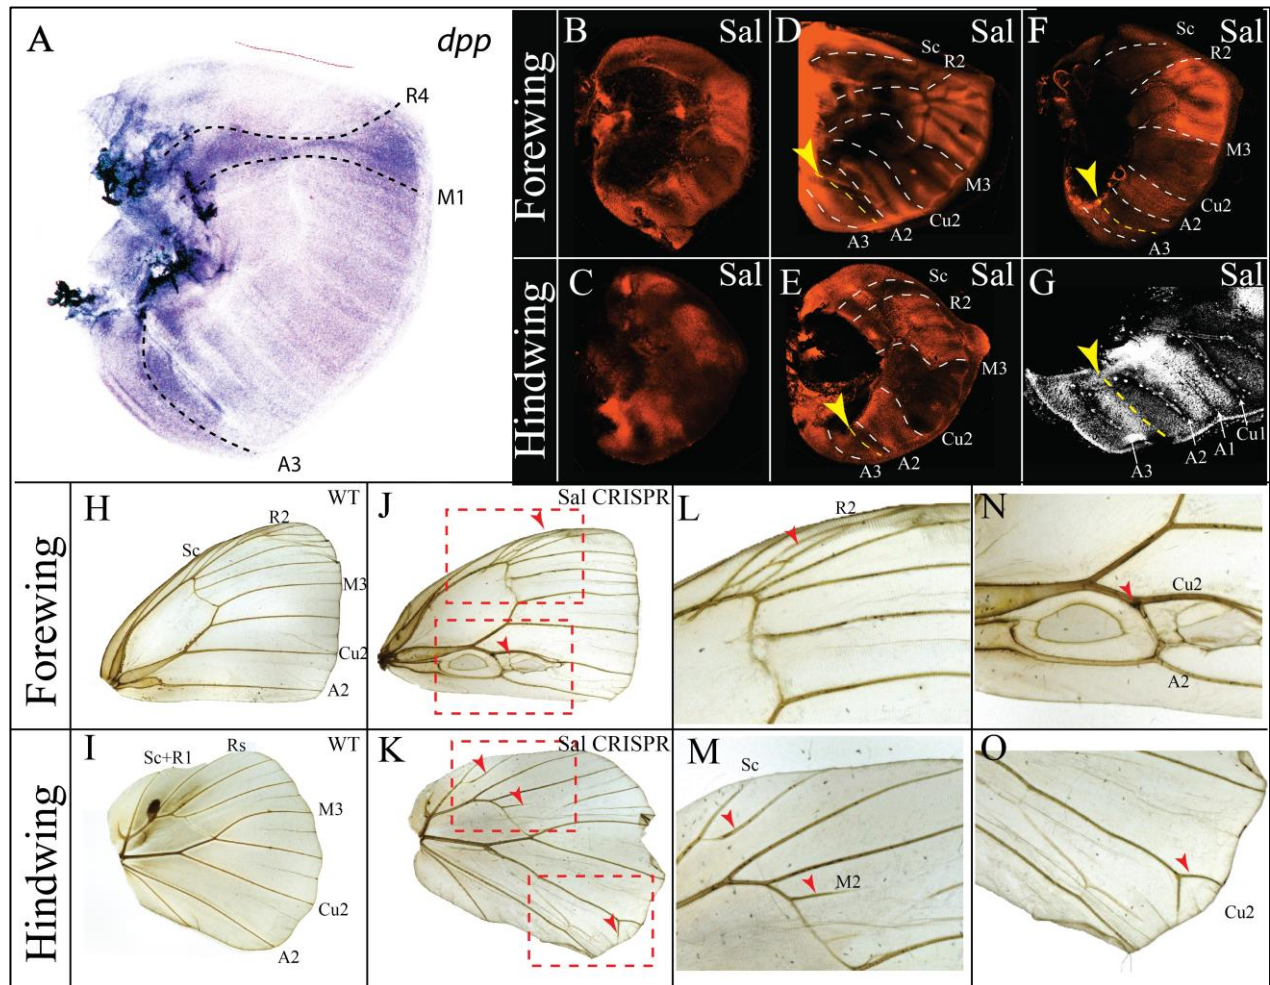

471  
472  
473  
474  
475  
476  
477  
478  
479  
480  
481  
482  
483  
484  
485  
486

**Fig. 2. Expression of *dpp* in *Bicyclus anynana*, expression of *Sal* in *Bicyclus anynana* and *Pieris canidia*, and function of *sal* in *Bicyclus anynana*.** (A) Expression of *dpp* in the larval wing of *Bicyclus* is visible at the A-P boundary spanning the M1 and R4 vein (for vein positioning at the same stage refer to **Fig. S7**) and along the A3 vein. Expression of *Sal* in (B) early, and (D) mid forewings, and in (C) early and (E) mid hindwings, showing distinct four distinct domains of expression: From the anterior margin till the Sc vein; from the R2 to M3 vein; from the Cu2 to A2 vein; and, from a boundary in between the A2 and A3 veins, and the posterior wing margin. (F) Expression of *Sal* in the larval forewing of *Pieris*; (G) Closeup of *Sal* expression in the lower posterior compartment showing the anterior boundary of the fourth *Sal* domain (yellow arrowhead and dotted yellow line). (H) WT adult forewing and (I) hindwing. (J, L and N) In CRISPR-Cas9 *sal* knock-out mosaic individuals' ectopic veins are produced within the boundaries of *Sal* expression in forewings and (K, M and O) ectopic as well as missing veins are produced within the *Sal* expression domains in hindwings.

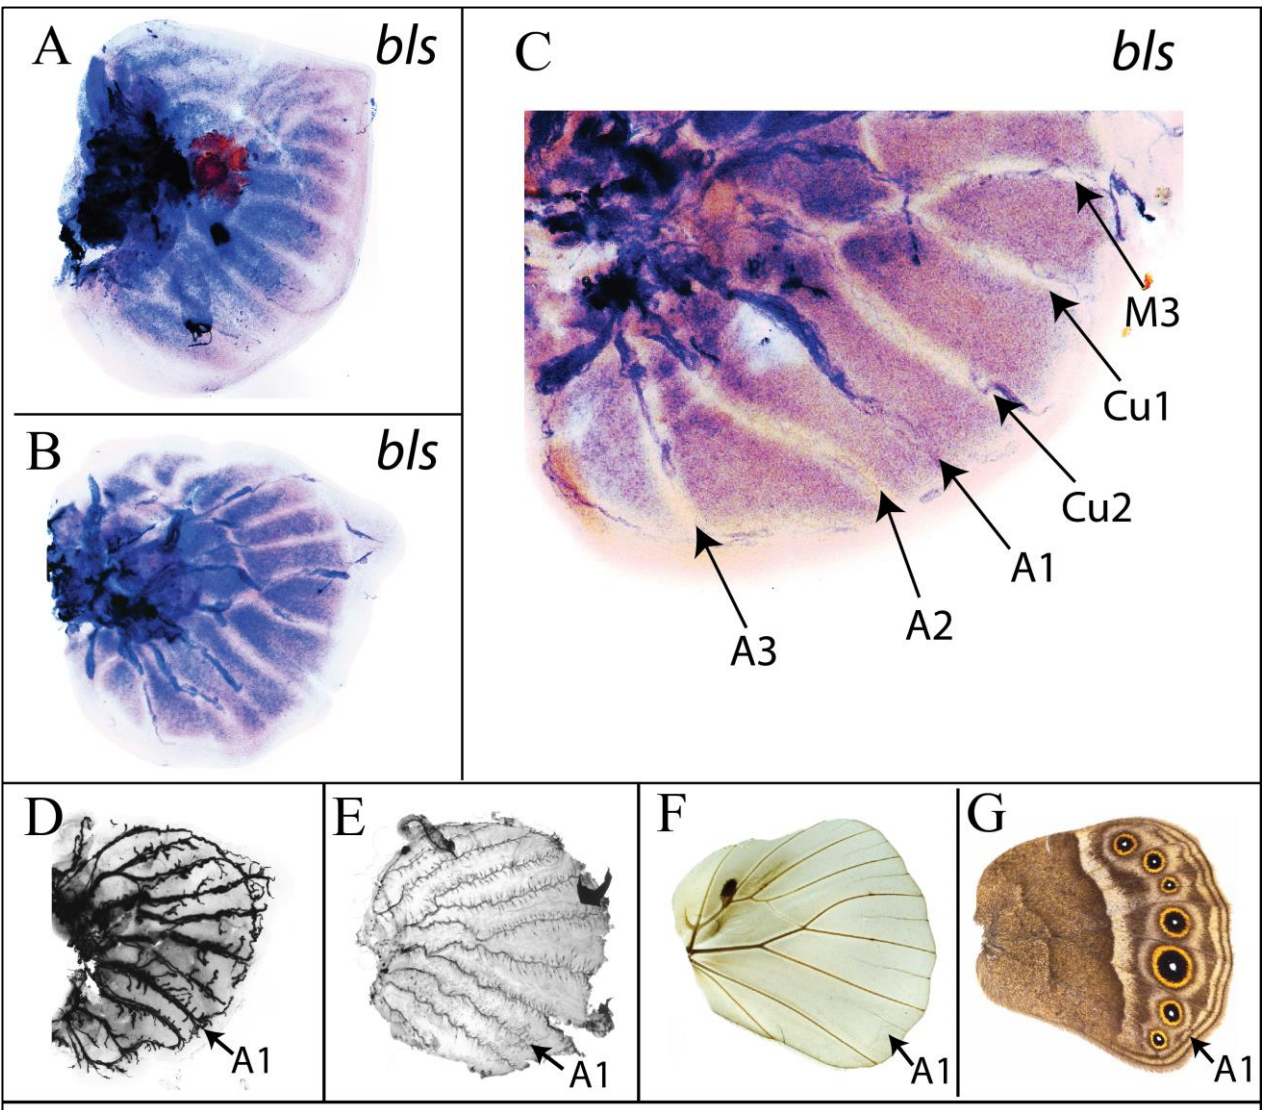

**Fig. 3. Expression of *blistered* (*bls*), and loss of the A1 vein in *Bicyclus anynana*.** (A) Expression of *bls* in the larval forewing, and (B) larval hindwing of *Bicyclus*. *bls* is expressed in the intervein cells during larval wing development. (C) Closeup of *bls* expression in the posterior compartment where expression is present along the A1 vein. (D-G) Disappearance of the A1 vein during *Bicyclus* wing development. (D) Larval Wing; (E) Pupal wing; (F) Adult wing with scales removed; (G) Adult wing with scales. The A1 vein is observed in the larval and pupal stages, but it disappears in the adult stage.

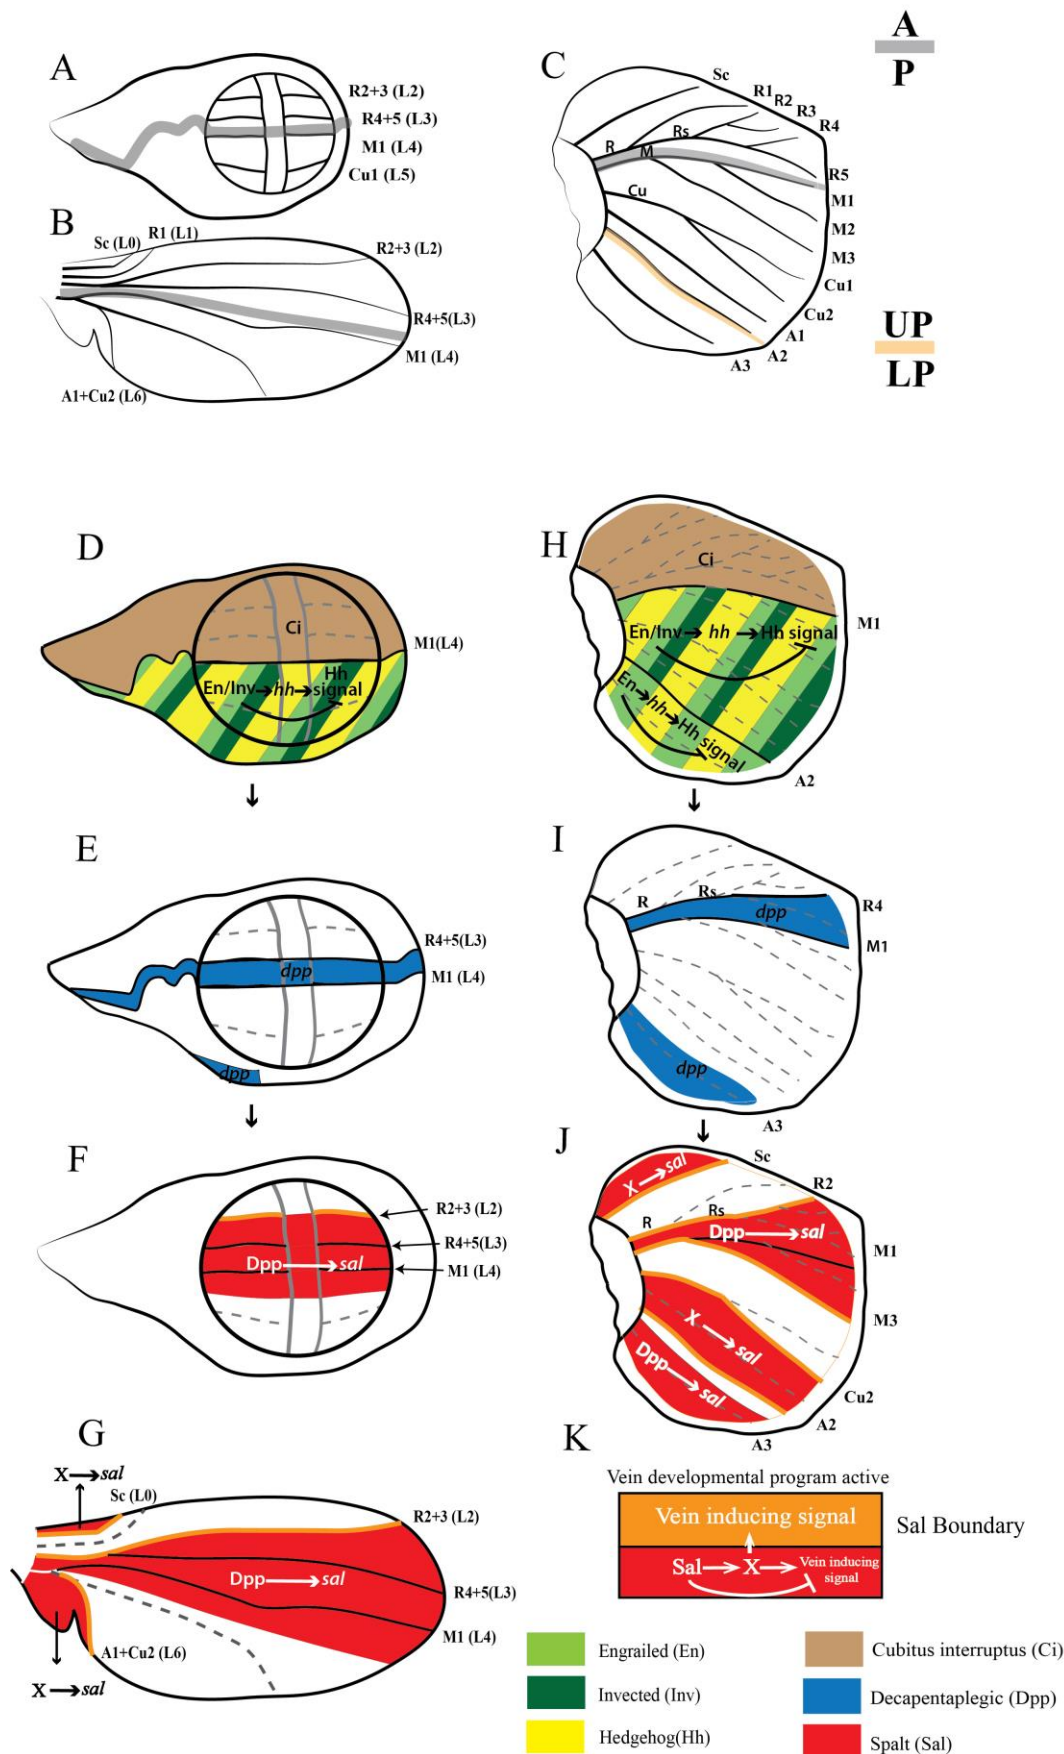

**Fig. 4. A model for venation patterning in *Bicyclus anynana* and comparison with *Drosophila melanogaster*.** (A) Venation in *Drosophila* larval wing; (B) Venation in *Drosophila* pupal wing; (C) Venation in *Bicyclus* larval forewing; The Anterior-Posterior

(A-P) boundary is marked by the thick grey line. The boundary between the Upper-Posterior (UP: from the M1 to A2 vein) and Lower-Posterior (LP: from the A2 vein till the posterior boundary) sectors of the wing is marked by the thick orange line. (D-G) Venation patterning in *Drosophila* wing (for details refer to the main text). (H) In *Bicyclus*, venation patterning is initiated by En and Inv expressed in the posterior compartment. En/Inv or En activates Hh in the posterior compartment, while suppressing Hh signaling. (I) A small amount of Hh diffuses into the anterior compartment where due to the presence of Hh signal transducer Ci, activates *dpp* in a thin stripe of cells in between the R4 and M1 veins. A second domain of *dpp* is activated around the A3 vein via a Hh independent mechanism. (J) In *Bicyclus*, Sal is expressed in four distinct domains. The first three domains are involved in induction of veins at their boundaries. (K) In *Drosophila* Sal induces vein development via the activation of a short-range hypothetical signal (X) and the inhibition of the signal from X. A small amount of X diffuses outside of the Sal expression domain, where it activates vein-inducing genes.

### Supplementary Materials

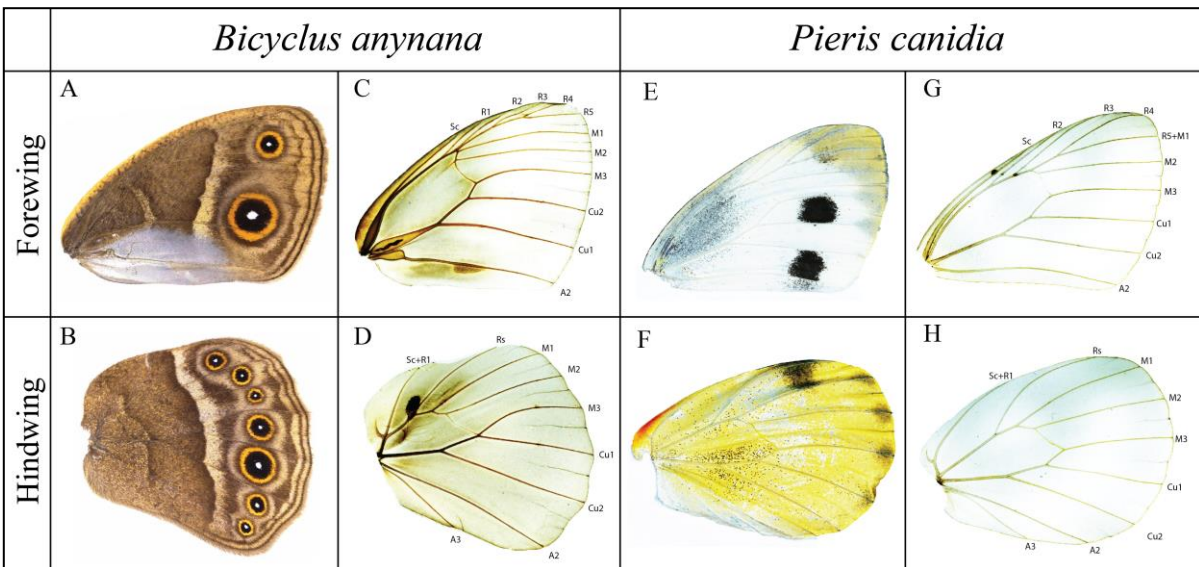

**Fig. S1. Venation pattern in butterflies. (A and C) *Bicyclus anynana* forewing, (B and D) and hindwing. (E and G) *Pieris canidia* forewing, (F and H) and hindwing.**

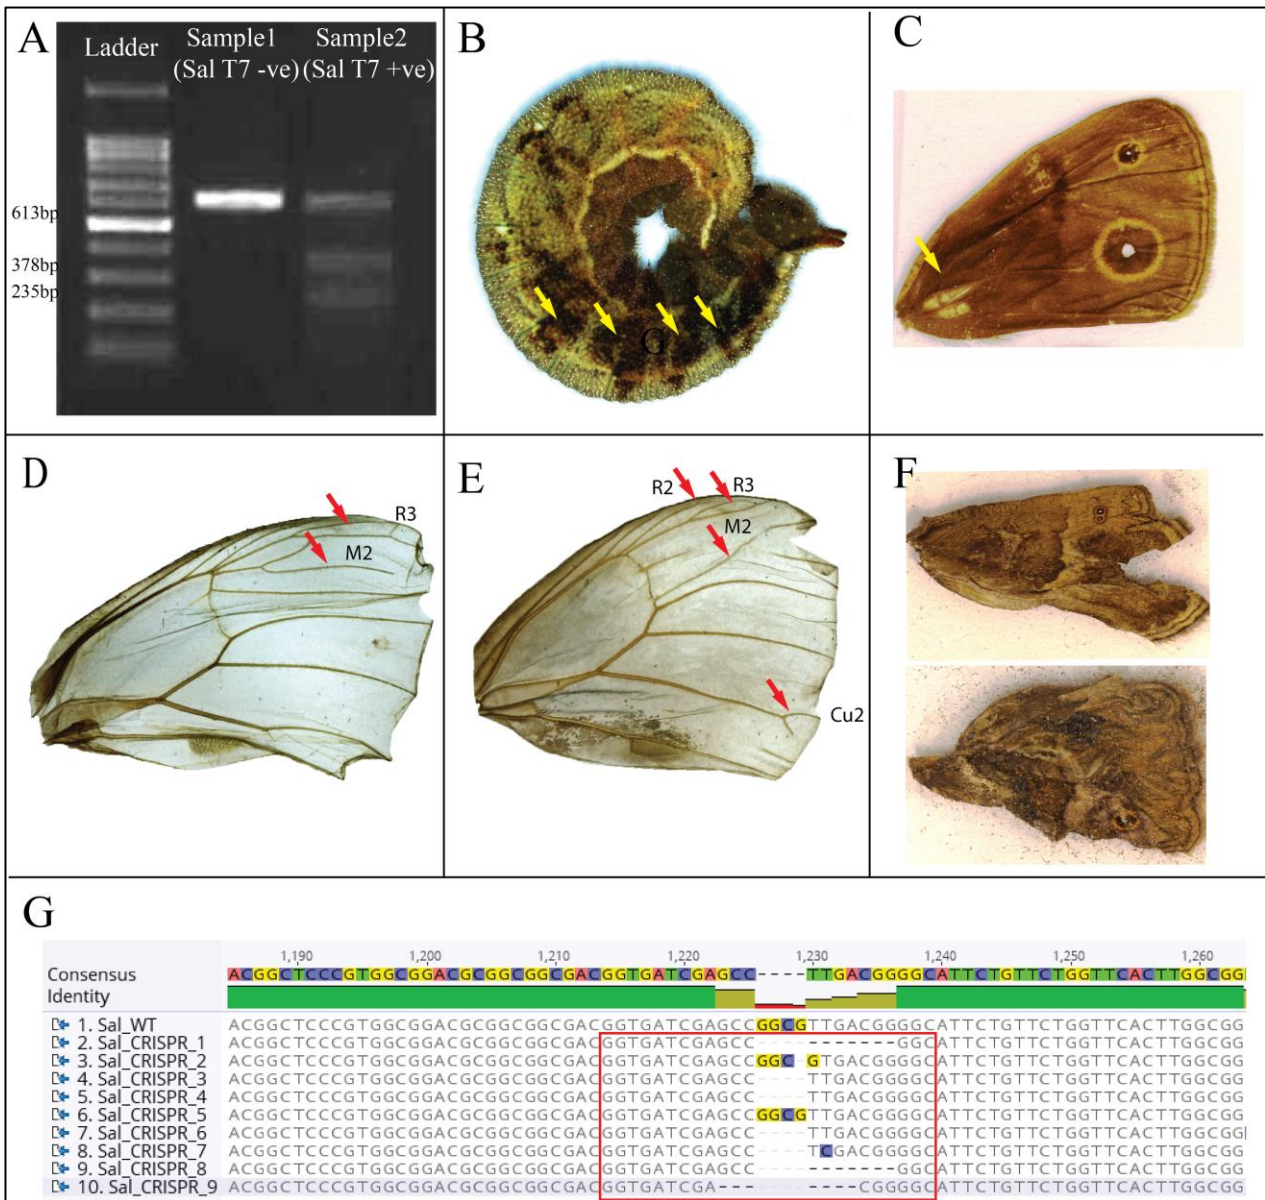

**Fig. S2. Spalt CRISPR-Cas9 on *Bicyclus anynana* butterflies.** (A) T7 endonuclease assay on *sal* guide and Cas9 injected individuals. Sample 2 with T7 endonuclease added shows two shorter DNA bands indicating cleavage of the PCR product. (B) Pigmentation defects on the embryos. (C) Adult wing showing defects in the auditory organ and eyespot on the wing, (D and E) Dorsal views of forewings showing venation defects in the region where *Sal* is expressed (red arrows). (F) Severe wing patterning defects in some individuals were observed. (G) Deletions of nucleotides at the CRISPR-Cas9 target site. The target region is marked by the red box.



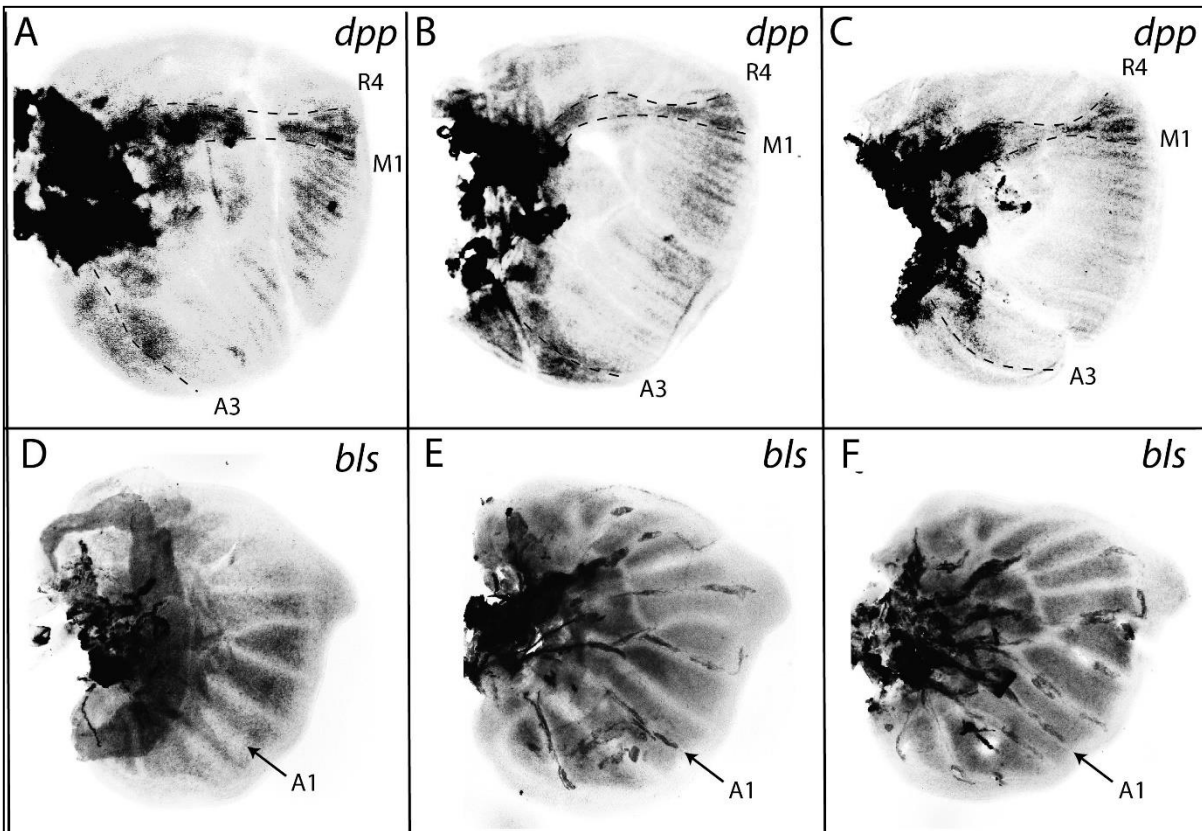

544  
545  
546  
547  
548  
549  
**Fig. S3. *decapentaplegic* (*dpp*) and *blistered* (*bls*) mRNA localization in *Bicyclus anynana*.** (A-C) *dpp* is expressed in two domains in the larval wings. (D-F) Expression of *bls*. *bls* is absent at the A1 vein at an early stage. However, during later stages *bls* has a stronger expression at the A1 vein.

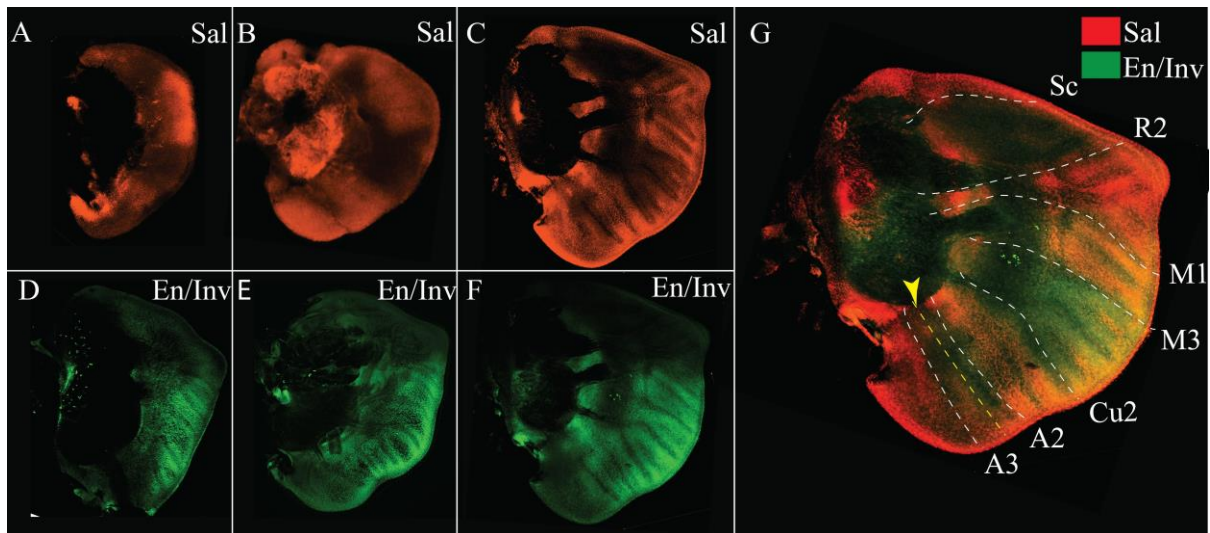

550  
551  
552  
553  
554  
**Fig. S4. Sal and En/Inv in *Bicyclus anynana*.** (A-C). Sal staining at different stages of wing growth. (D-F). En/Inv staining at different stages of wing growth. (G). Co-staining of Sal and En/Inv.

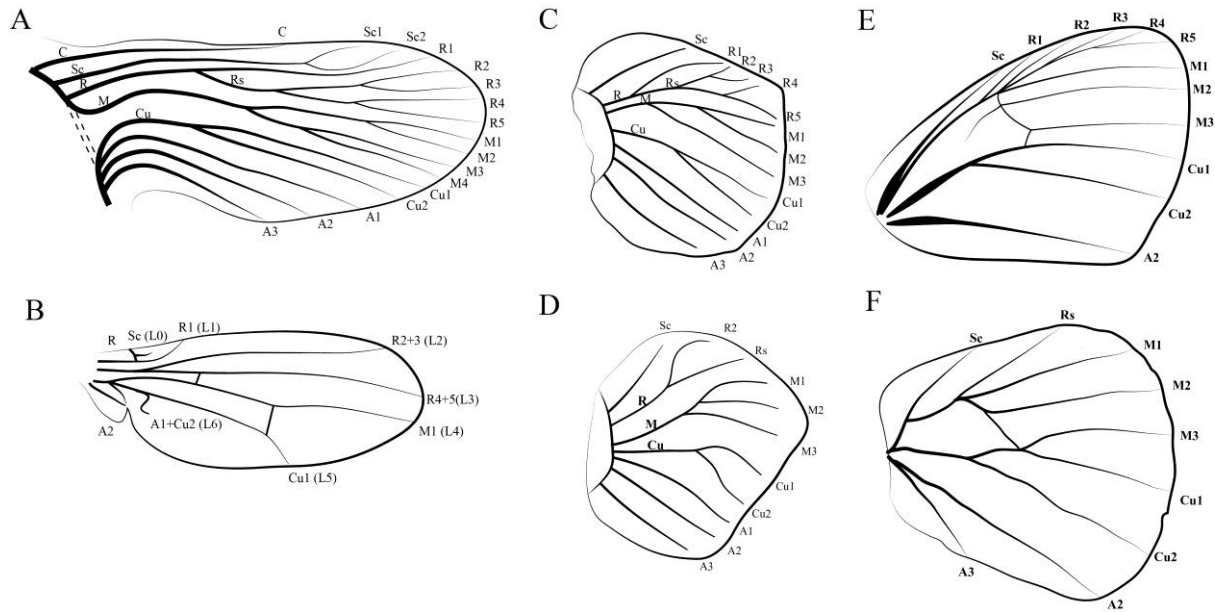

**Fig. S5. Venation patterns in insects.** (A) Comstock-Needham hypothetic venation of primitive insects (redrawn from (2)), (B) Wing venation of *Drosophila melanogaster* (redrawn from (11)), (C) Larval forewing venation and (D) hindwing venation of *Bicyclus* butterflies. Larval wings of *Bicyclus* were drawn based on methylene blue staining's (Fig. S5). (E) Adult forewing and (F) hindwing venation of *Bicyclus*.

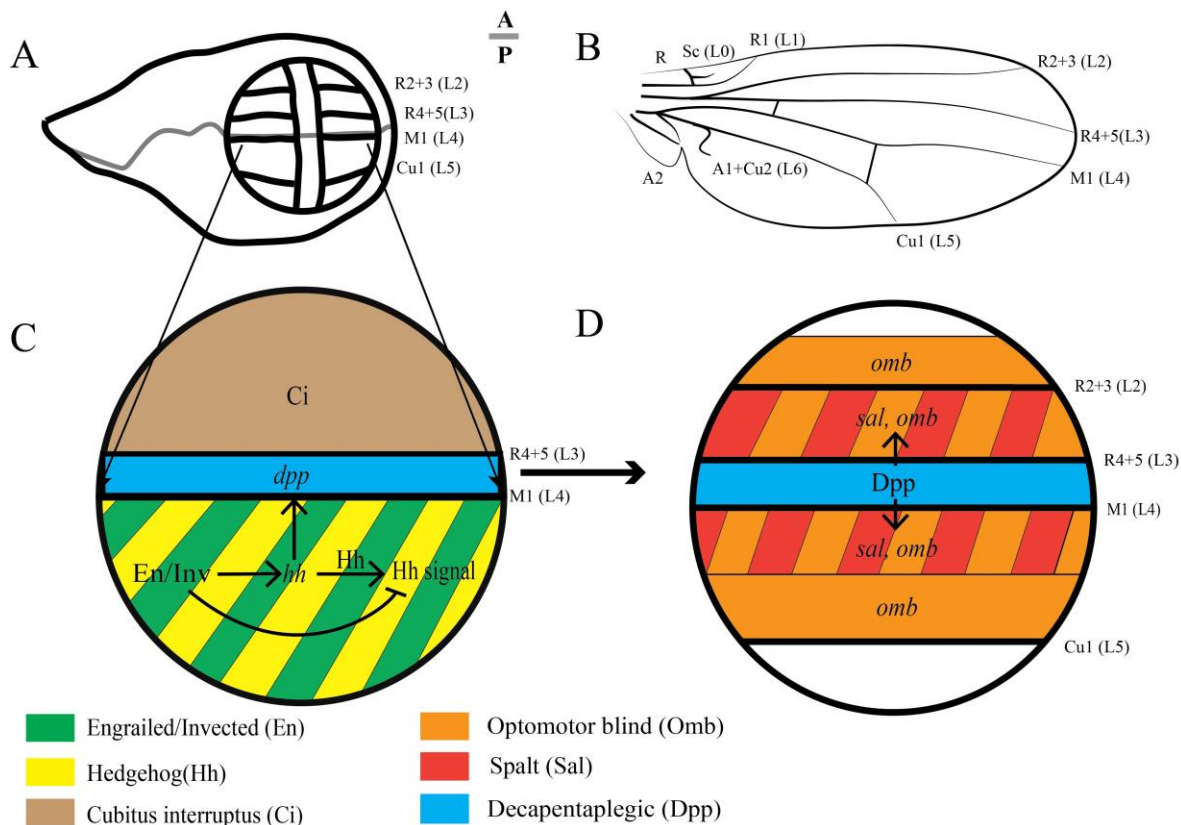

**Fig. S6. Molecular mechanism involved in venation patterning in *Drosophila melanogaster*.** (A) Larval wing disc of *Drosophila*. During the larval stage, the wing is divided into two populations of immiscible cells belonging to the Anterior (A) and

Posterior (P) compartments. The boundary where these two-populations meets is referred to as the Anterior-Posterior (A-P) boundary (marked by the gray line). **(B)** Adult wing of *Drosophila*. **(C)** Venation patterning is initiated by the transcription factors En and Inv in the posterior compartment that activate expression of *hh* while suppressing Hh signaling. Hh is a short-range diffusible morphogen. A small amount of Hh diffuses into the anterior compartment where the presence of Ci activates the BMP ligand *dpp*. The veins R4+5 (L3) and M1 (L4) form at the anterior and posterior boundary of the Hh signaling domain where *dpp* is expressed. **(D)** Dpp protein then acts as a long-range morphogen activating both *spalt* (*sal*) and *optomotor-blind* (*omb*) at high concentrations, and only *omb* when the concentration falls below the *sal*-inducing threshold. The vein R2+3 (L2) develops at the anterior boundary of Sal, while the vein Cu1 (L5) develops at the posterior boundary of Omb protein domains.

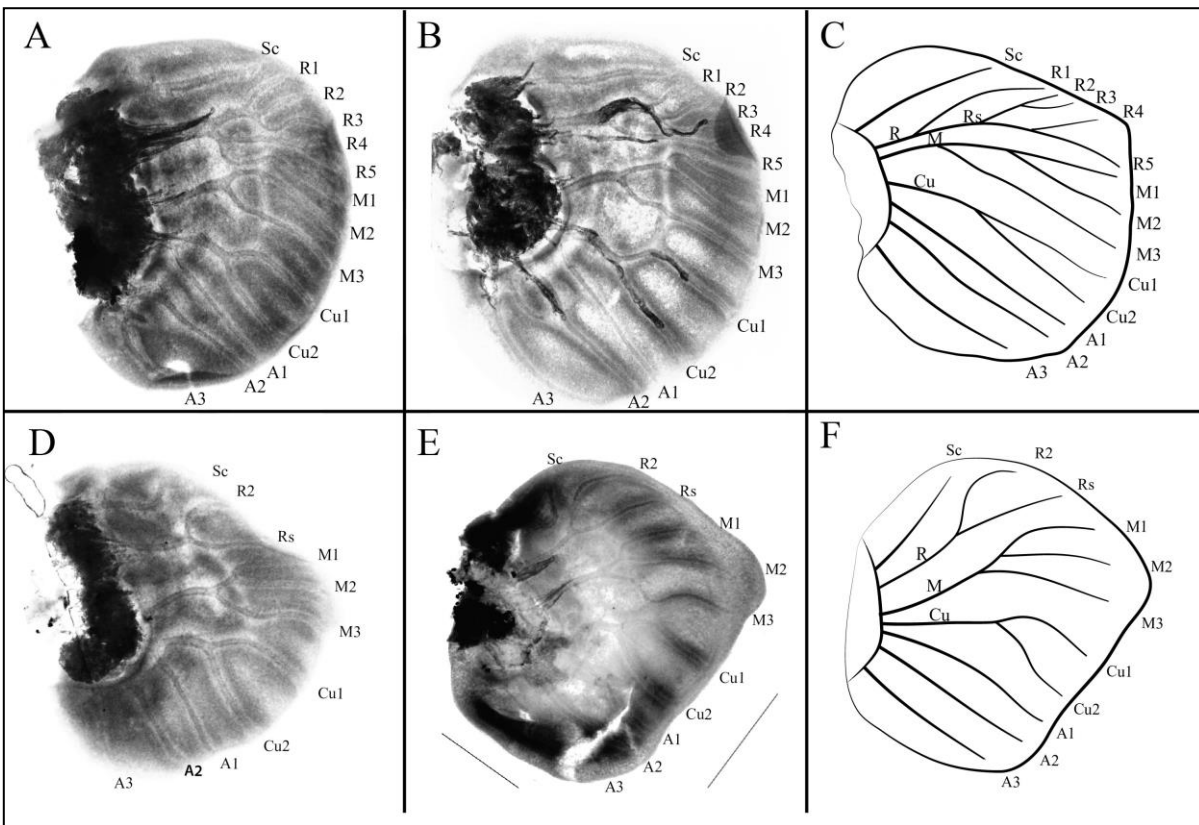

**Fig. S7. Methylene blue staining of *Bicyclus anynana* larval wings. (A, B)** Forewing stained with methylene blue; **(D, E)** Hindwing stained with methylene blue; **(C)** Illustration of forewing venation; **(F)** Illustration of hindwing venation.

**Table S1. Spalt CRISPR-Cas9 injection table**

| Sl. No. | Concentration | Date           | Eggs Injected | Hatchlings | % Hatchlings |
|---------|---------------|----------------|---------------|------------|--------------|
| 1.      | 300 ng/μl     | 28th Sept 2018 | 302           | 48         | 15.9         |
| 2.      | 300 ng/μl     | 10th Oct 2018  | 306           | 25         | 8.2          |
| 3.      | 300 ng/μl     | 11th Nov 2018  | 120           | 18         | 15           |
| 4.      | 300 ng/μl     | 9th Feb 2019   | 135           | 8          | 5.9          |

**Table S2. Primer table**

| Sl. No. | Primer Name | Sequence | Description |
|---------|-------------|----------|-------------|
|---------|-------------|----------|-------------|

|     |                        |                                                                                                  |                                                                             |
|-----|------------------------|--------------------------------------------------------------------------------------------------|-----------------------------------------------------------------------------|
| 1.  | Dpp_insitu_F           | GTTCTTCAACGTAAGCGG<br>CG                                                                         | Forward primer to amplify <i>dpp</i> for in-situ hybridization              |
| 2.  | Dpp_insitu_R           | CCACAGCCTACCACCATC<br>AT                                                                         | Reverse primer to amplify <i>dpp</i> for in-situ hybridization              |
| 3.  | En_insitu_F            | TTGAAGACCGTTGCAGTC<br>C                                                                          | Forward primer to amplify <i>en</i> for in-situ hybridization               |
| 4.  | En_insitu_R            | TAGATTGCTGTTCCCGCTT<br>T                                                                         | Reverse primer to amplify <i>en</i> for in-situ hybridization               |
| 5.  | Inv_insitu_F           | GGACCAAAGTGACGAAG<br>AGC                                                                         | Forward primer to amplify <i>inv</i> for in-situ hybridization              |
| 6.  | Inv_insitu_R           | TCCGGCACTCTAGCCTCT<br>AC                                                                         | Reverse primer to amplify <i>inv</i> for in-situ hybridization              |
| 7.  | Bls_insitu_F           | CTGACCGGCACCCAAGTG<br>AT                                                                         | Forward primer to amplify <i>bls</i> for in-situ hybridization              |
| 8.  | Bls_insitu_R           | CGTTGCGGGTGGTGAGAC<br>AT                                                                         | Reverse primer to amplify <i>bls</i> for in-situ hybridization              |
| 9.  | Sal_CRISPR_Se<br>q_F   | GCATCGACAAGATGCTGA<br>AA                                                                         | Forward primer to amplify <i>sal</i> for CRISPR-Cas9 invitro cleavage assay |
| 10. | Sal_CRISPR_Se<br>q_R   | TTCATTTAGGGACGGTGG<br>AG                                                                         | Reverse primer to amplify <i>sal</i> for CRISPR-Cas9 invitro cleavage assay |
| 11. | Sal_CRISPR_G<br>uide_F | GAAATTAATACGACTCAC<br>TATAGGTGATCGAGCCGG<br>CGTTGAGTTTTAGAGCTA<br>GAAATAGC                       | Forward primer for guide synthesis to knockout <i>sal</i>                   |
| 12. | Sal_CRISPR_G<br>uide_R | AAAAGCACCGACTCGGTG<br>CCACTTTTTCAAGTTGATA<br>ACGGACTAGCCTTATTTT<br>AACTTG<br>CTATTTCTAGCTCTAAAAC | Reverse primer for guide synthesis to knockout <i>sal</i>                   |

589  
590

**Table S3. In-situ hybridization Buffers**

| Buffers                                                                              | Chemicals                       | Amount       |
|--------------------------------------------------------------------------------------|---------------------------------|--------------|
| 10X PBS (500 ml)<br>* Sterilize by autoclaving.                                      | K <sub>2</sub> HPO <sub>4</sub> | 5.34 g       |
|                                                                                      | KH <sub>2</sub> PO <sub>4</sub> | 2.64 g       |
|                                                                                      | NaCl                            | 40.9 g       |
|                                                                                      | DEPC treated H <sub>2</sub> O   | To 500 ml    |
| 1X PBST (50 ml)                                                                      | 1X PBS                          | 50 ml        |
|                                                                                      | Tween® 20                       | 50 µl        |
| 20X SSC (1000 ml)<br>*Adjust the pH to 7.0 with 1M HCl and sterilize by autoclaving. | NaCl                            | 175.3 g      |
|                                                                                      | Trisodium citrate               | 88.2 g       |
|                                                                                      | DEPC treated H <sub>2</sub> O   | Till 1000 ml |
| Pre-hybridization buffer (40 ml)                                                     | Formamide                       | 20 ml        |
|                                                                                      | 20X SSC                         | 10 ml        |
|                                                                                      | DEPC treated water              | 10 ml        |
|                                                                                      | TWEEN20                         | 40 µl        |
| Hybridization buffer (40 ml)                                                         | Formamide                       | 20 ml        |

|                                     |                           |             |
|-------------------------------------|---------------------------|-------------|
|                                     | 20X SSC                   | 10 ml       |
|                                     | DEPC treated water        | 10 ml       |
|                                     | TWEEN20                   | 40 $\mu$ l  |
|                                     | Salmon sperm              | 40 $\mu$ l  |
|                                     | Glycine (100mg/ml)        | 40 $\mu$ l  |
| Block buffer (50 ml)                | 1X PBS                    | 50 ml       |
|                                     | TWEEN20                   | 50 $\mu$ l  |
|                                     | BSA                       | 0.1 gm      |
| Alkaline phosphatase buffer (20 ml) | Tris-HCl (pH 8.0)         | 2 ml        |
|                                     | NaCl (5M)                 | 400 $\mu$ l |
|                                     | MgCl <sub>2</sub> (200mM) | 250 $\mu$ l |
|                                     | DEPC treated water        | Till 20 ml  |
|                                     | TWEEN20                   | 20 $\mu$ l  |

**Table S4. Immunohistochemistry Buffers**

| Buffers              | Chemicals                 | Amount                               |
|----------------------|---------------------------|--------------------------------------|
| Fix buffer (30 ml)   | M PIPES pH 6.9 (500 mM)   | 6 ml                                 |
|                      | mM EGTA pH 6.9 (500mM)    | 60 $\mu$ l                           |
|                      | % Triton x-100 (20 %)     | 1.5 ml                               |
|                      | mM MgSO <sub>4</sub> (1M) | 60 $\mu$ l                           |
|                      | 37% Formaldehyde          | 55 $\mu$ l per 500 $\mu$ l of buffer |
|                      | dH <sub>2</sub> O         | 22.4 ml                              |
| Block buffer (40 ml) | 50 mM Tris pH 6.8 (1 M)   | 2 ml                                 |
|                      | 150 mM NaCl (5 M)         | 1.2 ml                               |
|                      | 0.5% IGEPAL (NP40) (20%)  | 1 ml                                 |
|                      | 5 mg/ml BSA               | 0.2 gr                               |
|                      | H <sub>2</sub> O          | 35.8 ml                              |
| Wash buffer (200 ml) | 50mM Tris pH 6.8 (1 M)    | 10 ml                                |
|                      | 150 mM NaCl (5 M)         | 6 ml                                 |
|                      | 0.5% IGEPAL (20 %)        | 5 ml                                 |
|                      | 1 mg/ml BSA               | 0.2 gr                               |
|                      | dH <sub>2</sub> O         | 179 ml                               |
| Mounting media       | Tris-HCl (pH 8.0)         | 20 mM                                |
|                      | N-propyl gallate          | 0.5%                                 |
|                      | Glycerol                  | 60%                                  |

Sequence of engrailed used for in-situ hybridization.

TTGAAGACCGTTGCAGTCCGAACCAGGCCAACAGCCCCGGTCCGGTCACCGGCAGAG  
TCCCTGCGCCTCACTCCGAAGTAAGAAACGNGTACCAAAGTCAATACACTTGCACGA  
CTATCGATCAAAGGTTTGACAGAACGATGACAGTGGTGAAAGTGCAGCCGAATTCAC  
CACCGATGAGTCCACTGACGTGAAGCCCATAATCCCTGAGTTTGAAGACAAGAGAAA

600 CCGACAACCACCACCAACCATAACCCTTCTCTATCAGCAACATATTACACCCAGAATTC  
601 GGTTTGACAGCGATTTCGAAAAACGAACAAAATCGAAGGACCAAACACGTCGGCCC  
602 CAACCACAGCATTTTGTACAAACCTTATTTGTTCGAACGAGTTATCGAGTTCGAAATTC  
603 AATTTTCGATTATTTAAAATCTAAGGATGATTTTCGGTGCATTACCTCCACTTGGCGGTT  
604 TGAGGCAGACCGTGTTCGAATATTGGAGAACAGAAGGAGGCACCAAAGATTATAGAG  
605 CAGCAGAAGAGGCCAGATTCAGCCAGCTCTATTGTCTCTTCCACATCTAGCGGGGCT  
606 TTATCGACGTGTGGCAGCACTGACGCCAACAGCAGTCAAAGCGGGAACAGCAATCTA

607

608 Sequence of *invected* used for *in-situ* hybridization.

609 GGACCAAAGTGACGAAGAGCACGACCCCTACTCGCCCAACACTAGAGACACCATCA  
610 CACCAGACTTCATAGAAGAAGACAAACAAGACAGGCCTATACACACATCCTCTTTCT  
611 CCATACACAATGTCCTTAAGAAGGAAAGAGACAGTAATAGTCCTGAGAACGTCTTCT  
612 CAACTGAAAAGTTGTTGCAAAGTACACCGAACTTTGAAGATTCTAGGAACTCTGAAA  
613 GCGTTAGTCCGAGACTTGAAGATGATCACAATGAAAGAGCTGATATAAGTGTTGATG  
614 ACAACTCTTGTTGTAGTGATGATACTGTGCTATCTGTTGGCAATGAAGCCTTACCAAC  
615 CAATTACCCAAACGACAAAGATCCGAACCAAGGCTTAACCTCCTTCAAACATATACA  
616 AACTCATTTGAACGCAATATCACAGTTAAGTCAAATTTAAACATAAACCAACCAAT  
617 CCTCCTACGACCCAACCAATAACACCAAACCCGTTAATGTTCTAAACCAACCGTT  
618 GTTATTCCAAAACCTTTAATAAACCAAGTGGATTTAAAATCAGGGTTACCGAGAAT  
619 CGGCTTGCAGCAAACAATTTAAATTTGAACCAAAAATTACATGAATTATGCGAGAAA  
620 AAATGAACTGAACGAAAGACGACAGAGTTATTCACCGAAGTTACATGAAAATGAGT  
621 CAAGTAGAGATTTTATTAACCAAGGATGTTTGAAATTTAGCATTGATAATACTGA  
622 AAGCTGATTTTGGTAGACGAATTACTGATCCGTTGACAAAGAGAAAAACGAAGACG  
623 AGGCAGTATGAGGCAAATCTACCCCTGTCAAAGAGGTTTCAGTCTCCCCCTAAAGAG  
624 GTAGAGGCTAGAGTGCCGGA

625

626 Sequence of *decapentaplegic* used for *in-situ* hybridization.

627 GTTCTTCAACGTAAGCGGCGTACCGGCCGACGAGGTGGCGCGCGGCGCCGACCTCTC  
628 GTTCCAACGAGCCGTCGGCACCACCGGCAGACAGAGACTGTTGTTGTACGACGTGGT  
629 GCGCCCTGGCCGCGCGGCCACTCCGAGCCGATCCTGCGGCTGCTGGACTCCGTTCC  
630 GCTCCGGCCCGGGGAGGGAATCGTCAAACGCCGACGCTCTGGGAGCGGCGCGACGGT  
631 GGCTCAAAGAGCCCAAACATAATCACGGACTATTAGTGCGAGTGTTAGAAGAAGAC  
632 GCCGCGAGTGCGAGCAGGGACGCGAAGTTCCCGCACGTGCGCGTGCGCAGACGCGT  
633 CACGGACGAGGAGGAGGAGTGGCGGACGGCGCAGCCGCTGCTCATGCTGTACACGG  
634 AGGACGAGCGCGCGCGCGTTCGCGGGAGACGAGCGAGCGGCTGACGCGCAGCAAG  
635 CGCGCGGCGCAGCGGCGGGGGCACC GCGCGCACCACCGCCGCAAGGAGGCGCGCGA  
636 GATCTGCCAGCGCCGCCCGCTGTTTCGTCGACTTCGCGGACGTGGGCTGGAGCGACTG  
637 GATCGTGGCCCCGCACGGCTACGACGCGTACTACTGCCAGGGGCGACTGCCCTTCCC  
638 GCTGCCGGACCACCTCAACGGCACGAACCACGCGATAGTGCAGACTCTGGTCAACTC  
639 AGTGAACCCCGCGACGGTGCCCAAAGCGTGCTGCGTGCCGACGCAACTCTCATCTAT  
640 ATCTATGTTATATATGGACGAAGTGAACAATGTGGTGCTTAAAACTATCAGGACAT  
641 GATGGTGGTAGGCTGTGG

642

643 Sequence of *blistered* used for *in-situ* hybridization.

644 GCATACGAGCTATCAACGCTGACCGGCACCCAAGTGATGCTGCTGGTTCGCGTCCGAGACCGG  
645 CCACGTGTACACGTTTCGCGACACGCAAACCTGCAGCCGATGATCACGTCCGACTCGGGCAAGC  
646 GGCTCATACAGACGTGCCTCAACTCGCCCGACCCGCCACCACCAGCGAGCAGCGCATGGCC  
647 GCCACCGGCTTCGAGGAGACCGAGCTCACGTATAACGTTGTAGACGACGAGATGAAGGTGAG  
648 ACAACTGGCGTACGCTAACCAGTACCCATAGAGCACCACCCGGGGTTGGCGCCGTCGCCAC  
649 TGCAGCAGTACCACCAGCACC CGCCCTGCCCTCGCCCTCCCCCTCGGCTCGCTGGGCCAGC  
650 CGTACTCGCACGCGCATCTATCGCACCCCCACATGTCTCACCACCCGCAACG

651

652 Region of *spalt* used for CRISPR-Cas9 (Highlighted in red)

653 GCATCGACAAGATGCTGAAAATAATAATAGTCTCGAAGACGGCGAGGCCGAAATAC  
654 CTGAAGCCGACATGCCCCCGTGGGTCTGCCGTTCCCTTTGGCAGGACACGTTACTCT  
655 TGAGGCTCTACAAAATACGAGAGTAGCGGTCGCCCAATTCGCTGCAACAGCGATGGC  
656 AAATAATGCGAATAACGAAGCTGCTATACAAGAATTACAAGTGTTACACAACACTCT  
657 ATACACTTTACAGTCACAACAAGTATTTCAACTTCAGTTAATACGTCAGCTTCAGAAT  
658 CAGTTATCTCTAACTCGACGGAAAGAAGACGATCCACACAGCCCACCGCCAAGTGAA  
659 CCAGAACAGAATGCCCCG**TCAACGCCGGCTCGATCACC**GTCGCCGCCGCGTCCGCCA  
660 CGGGAGCCGTCGCCTGTTATACCCTCTCCTCCTACTAGCCAAAGTTTGCCGTCGACTC  
661 ACACACATCACACACCCAAAACCTGAACAGATATCTATCCCTAAGATTCCAACCTCCT  
662 CACCATCTTTAATGACCCACCCACTTTATAGTTCAATTTCTTCGTCATTAGCATCTTCC  
663 ATCATAACAAACAATGATCCTCCACCGTCCCTAAATGAA
